# Supplementary material for: Group A streptococci clones associated with invasive infections and pharyngitis in Portugal present differences in emm types, superantigen gene content and antimicrobial resistance
Source: PubMed Central journal article supplement (PMC3543706; doi:10.1186/1471-2180-12-280), 2012-11-27
Supplement: 1471-2180-12-280-S1.pdf [file 1471-2180-12-280-S1.pdf]

Additional file 1 – SAg gene profiles identified in GAS isolates in Portugal.

| <b>SAg profile</b> | <b>No. of isolates</b> | <i>speA</i> | <i>speC</i> | <i>speG</i> | <i>speH</i> | <i>speI</i> | <i>speJ</i> | <i>speK</i> | <i>speL</i> | <i>speM</i> | <i>ssa</i> | <i>smeZ</i> |
|--------------------|------------------------|-------------|-------------|-------------|-------------|-------------|-------------|-------------|-------------|-------------|------------|-------------|
| 1                  | 1                      | +           | +           | -           | -           | -           | -           | -           | -           | -           | +          | +           |
| 2                  | 31                     | +           | +           | +           | -           | -           | -           | +           | -           | -           | -          | +           |
| 3                  | 2                      | +           | +           | +           | -           | -           | +           | -           | -           | -           | -          | +           |
| 4                  | 2                      | +           | +           | +           | -           | -           | -           | -           | +           | +           | -          | +           |
| 5                  | 2                      | +           | +           | +           | -           | -           | -           | -           | -           | -           | -          | +           |
| 6                  | 1                      | +           | -           | +           | +           | +           | +           | -           | -           | -           | +          | +           |
| 7                  | 1                      | +           | -           | +           | +           | -           | +           | -           | -           | -           | -          | +           |
| 8                  | 49                     | +           | -           | +           | -           | -           | -           | +           | -           | -           | +          | +           |
| 9                  | 1                      | +           | -           | +           | -           | -           | -           | +           | -           | -           | -          | +           |
| 10                 | 57                     | +           | -           | +           | -           | -           | +           | -           | -           | -           | -          | +           |
| 11                 | 7                      | +           | -           | +           | -           | -           | -           | -           | -           | -           | -          | +           |
| 12                 | 6                      | -           | +           | +           | +           | +           | +           | -           | -           | -           | +          | +           |
| 13                 | 3                      | -           | +           | +           | +           | +           | -           | -           | -           | -           | +          | +           |
| 14                 | 1                      | -           | +           | +           | +           | -           | -           | -           | -           | -           | +          | +           |
| 15                 | 2                      | -           | +           | +           | +           | +           | +           | +           | -           | -           | -          | +           |
| 16                 | 15                     | -           | +           | +           | +           | +           | -           | -           | -           | -           | -          | +           |
| 17                 | 3                      | -           | +           | +           | +           | -           | -           | -           | -           | -           | -          | +           |
| 18                 | 1                      | -           | +           | +           | -           | -           | +           | +           | -           | -           | +          | +           |
| 19                 | 3                      | -           | +           | +           | -           | -           | -           | +           | -           | -           | +          | +           |
| 20                 | 5                      | -           | +           | +           | -           | -           | +           | -           | -           | -           | +          | +           |
| 21                 | 7                      | -           | +           | +           | -           | -           | -           | -           | -           | -           | +          | +           |
| 22                 | 3                      | -           | +           | -           | -           | -           | -           | -           | +           | +           | +          | +           |
| 23                 | 52                     | -           | +           | -           | -           | -           | -           | -           | -           | -           | +          | +           |
| 24                 | 17                     | -           | +           | +           | -           | -           | +           | +           | -           | -           | -          | +           |
| 25                 | 2                      | -           | +           | +           | -           | -           | -           | +           | +           | +           | -          | +           |
| 26                 | 2                      | -           | +           | +           | -           | -           | -           | +           | -           | -           | -          | +           |
| 27                 | 44                     | -           | +           | +           | -           | -           | +           | -           | -           | -           | -          | +           |
| 28                 | 3                      | -           | +           | +           | -           | -           | -           | -           | +           | +           | -          | +           |
| 29                 | 21                     | -           | +           | +           | -           | -           | -           | -           | -           | -           | -          | +           |
| 30                 | 3                      | -           | +           | -           | -           | -           | -           | -           | -           | -           | -          | +           |
| 31                 | 16                     | -           | +           | +           | -           | -           | -           | -           | +           | +           | -          | -           |
| 32                 | 16                     | -           | -           | +           | +           | +           | +           | -           | -           | -           | +          | +           |
| 33                 | 30                     | -           | -           | +           | +           | +           | -           | -           | -           | -           | -          | +           |
| 34                 | 1                      | -           | -           | +           | +           | -           | +           | -           | -           | -           | -          | +           |
| 35                 | 3                      | -           | -           | +           | +           | -           | -           | -           | -           | -           | -          | +           |
